# Supplementary material for: Reliable SERS detection of nitrite based on pH and laser irradiance-dependent diazotization through a convenient sampling micro-chamber
Source: Royal Society of Chemistry journal article supplement (doi:10.1039/c6an00880a), 2016-01-01
Supplement: c6an00880a1.pdf [file c6an00880a1.pdf]

## Supporting information

### ***Reliable SERS Detection of Nitrite based on pH and Laser Irradiance-dependent Diazotization through a Convenient Sampling Micro-chamber***

Mengyue Gao, Wei Fang, Jiaqiang Ren, Aiguo Shen\* and Jiming Hu\*

*Key Laboratory of Analytical Chemistry for Biology and Medicine, Ministry of Education, College of Chemistry and Molecular Sciences, Wuhan University, Wuhan 430072, P. R. China.. Email: [aqshen@whu.edu.cn](mailto:aqshen@whu.edu.cn), [jmhu@whu.edu.cn](mailto:jmhu@whu.edu.cn)*

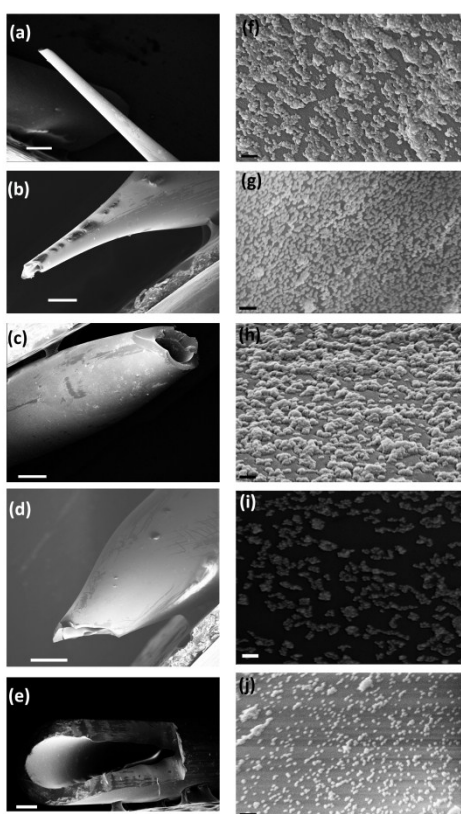

**Fig. S1** SEM images of different distal tips (a-e) and its inner surface of micro-chambers morphology (f-j) with different sizes of orifice: (a) 25, (b) 100, (c) 200, (d) 300, (e) 500 μm. Scale bars:(a-e) 100 μm, (f-j) 200 nm.

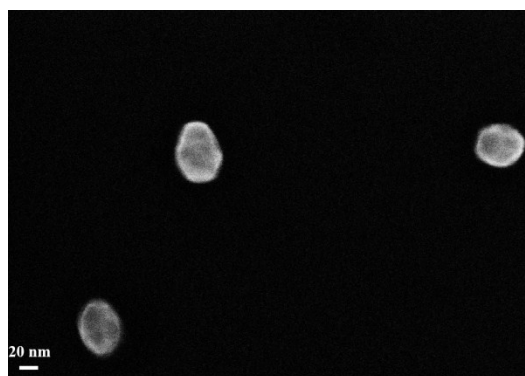

**Fig. S2** SEM image of 50 nm Au NPs

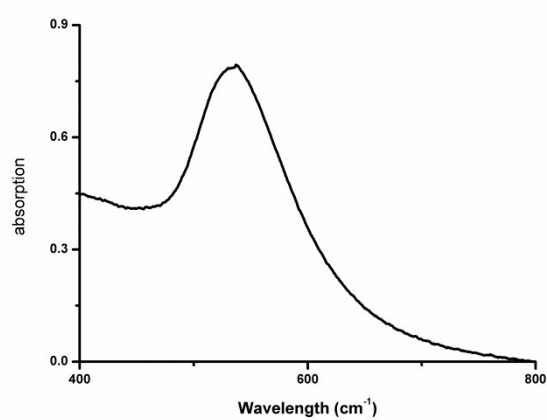

**Fig. S3** UV-vis absorption spectrum of 50±5 nm gold collides.

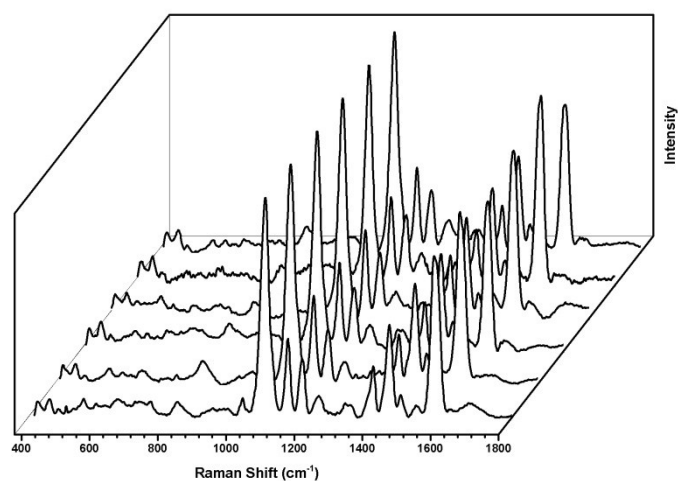

**Fig. S4** SERS spectra of PATP reacted with 100 μM NO<sub>2</sub><sup>-</sup> ions based in the different micro-chambers (normalized Raman band at 1141 cm<sup>-1</sup> to the peak intensity at 1078 cm<sup>-1</sup>; laser power 1.75 mW and pH=1).

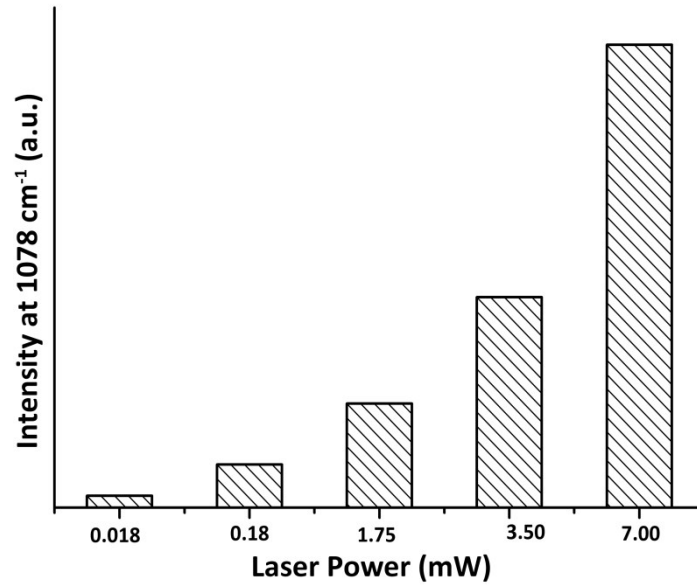

**Fig.S5** The intensity of SERS band at 1078 cm<sup>-1</sup> under different laser power illumination (pH=7)

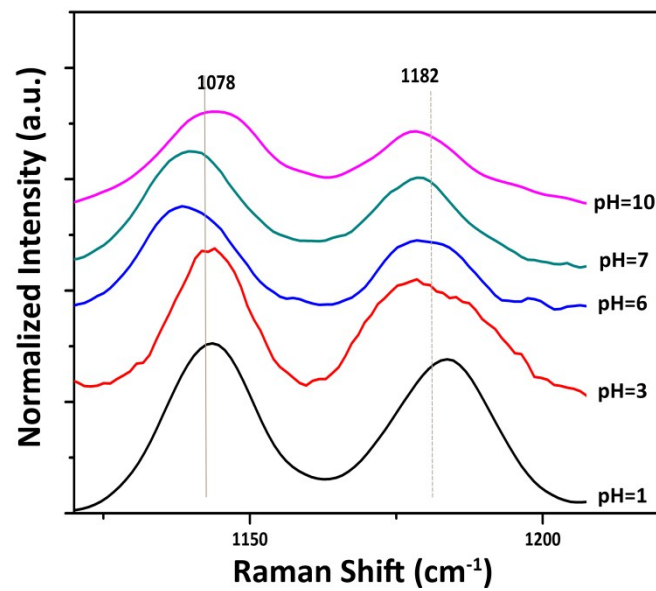

**Fig. S6** The enlarged panel of the characteristic peaks at 1141 and 1182 cm<sup>-1</sup> of PATP-capped micro chambers reacted with 100 μM NO<sub>2</sub><sup>-</sup> under different conditions. (Power laser 1.75 mW)

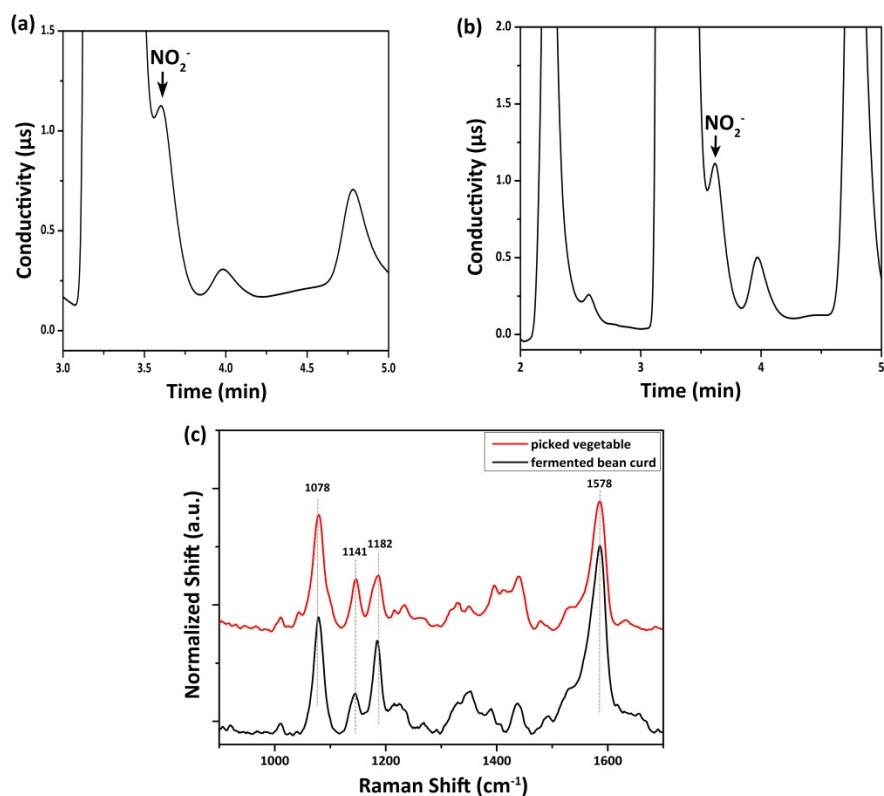

**Fig. S7** The ion chromatography of fermented bean curd (a) and pickled vegetable (b), the SERS spectra of real samples. (c) The SERS spectra of  $\text{NO}_2^-$  reacted with PATP-capped micro-chamber in real samples.

**Table S1** Quantitative Result of  $\text{NO}_2^-$  ions in real samples through SERS and IC measurement respectively

|                     | $C_{\text{SERS measurement}} (\mu\text{M})$ | $C_{\text{IC measurement}} (\mu\text{M})$ | relative error | RSD    |
|---------------------|---------------------------------------------|-------------------------------------------|----------------|--------|
| fermented bean curd | 83.52                                       | 72.62                                     | 0.1501         | 0.2114 |
| pickled vegetable   | 133.8                                       | 116.6                                     | 0.1475         | 0.1908 |
